# Supplementary material
Source: MDPI journal article supplement (https://www.mdpi.com/2073-4433/10/7/350)
Supplement: s1 [file s1]

Supplementary Materials for “Analysis of Mountain Wave Effects on a Hard Landing Incident in Pico Aerodrome using the AROME Model and Airborne Observations”

14-06-2019

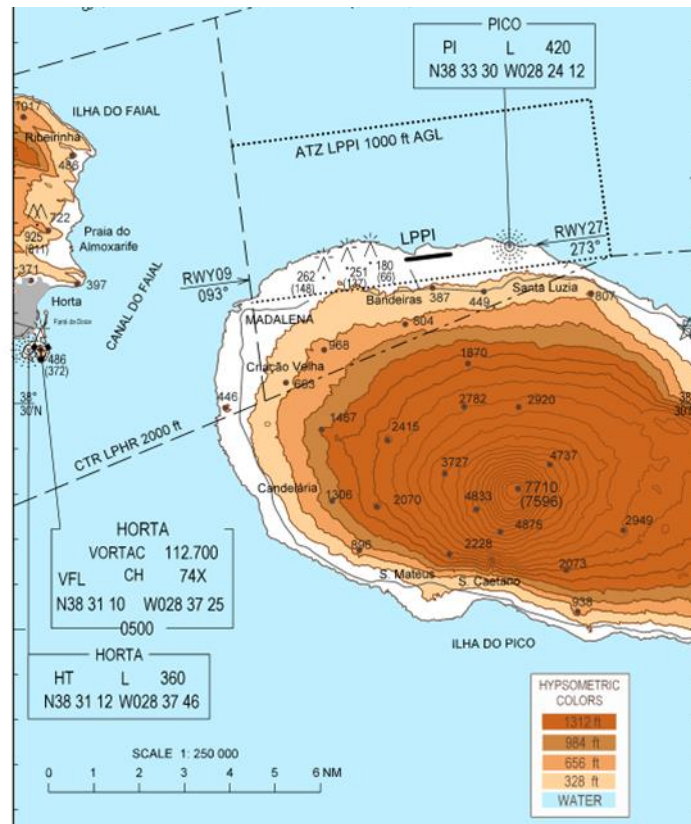

(a)

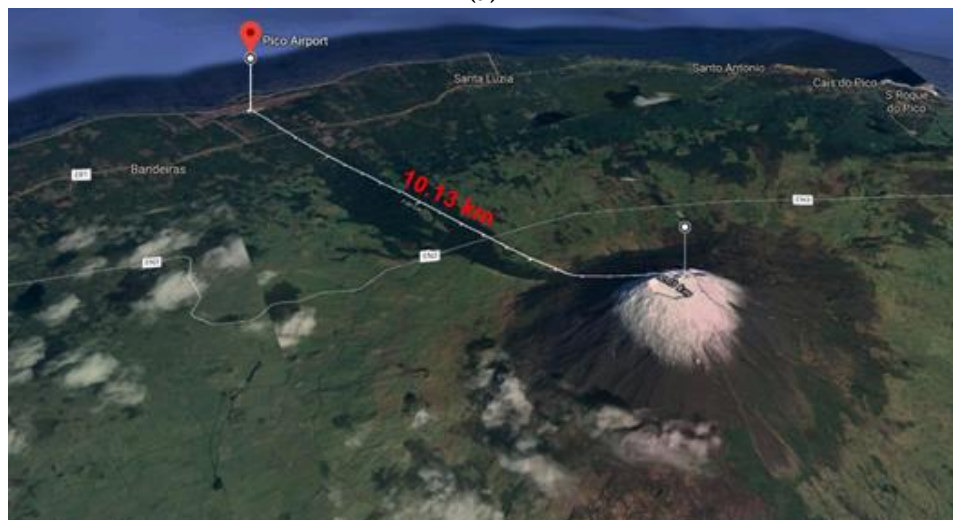

(b)

**Figure S1.** (a) Enlarged view of Pico Mountain and its Aerodrome (LPPI), from NAV Portugal (<https://www.nav.pt/docs/AIS/aerodromos/pico.pdf?sfvrsn=20>); (b) Location of Pico Aerodrome (LPPI) relative to Pico Mountain, from Google Earth.

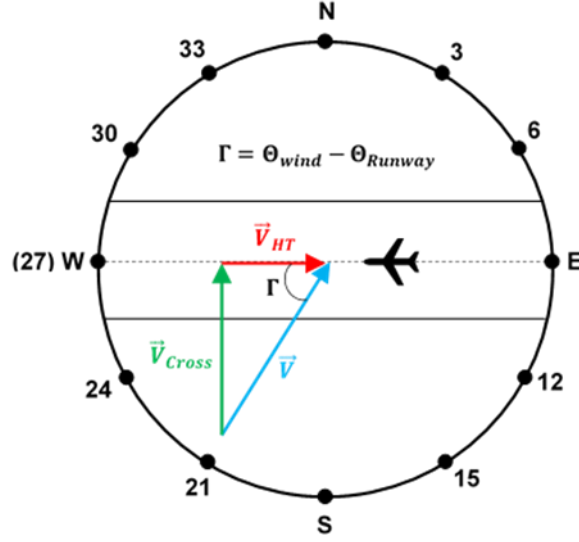

*Figure S2: Cross and headwind components.*

The calculation of the head or tailwind component  $V_{HT}$  that appears in Eq. 2 in the main article is done by resolving the wind vector  $\vec{V}$  according to the angle  $\Gamma$  (see Figure S2), which depends on the runway bearing  $\Theta_{runway}$  and wind direction  $\Theta_{wind}$  both in degrees. Expressions for  $V_{HT}$  and  $V_{Cross}$  (the crosswind component) are provided respectively by:

$$V_{HT} = -|\vec{V}| \cos \left[ (\Theta_{wind} - \Theta_{Runway}) \cdot \frac{\pi}{180} \right], \quad (S2.1)$$

$$V_{Cross} = |\vec{V}| \sin \left[ (\Theta_{wind} - \Theta_{Runway}) \cdot \frac{\pi}{180} \right]. \quad (S2.2)$$

The runway bearing in degrees is determined in relation to the runway code according to Eq S2. 3. For Pico Aerodrome, this can be either 27 or 9.

$$\Theta_{Runway} = Runway\ Code \times 10 \quad (S2.3)$$

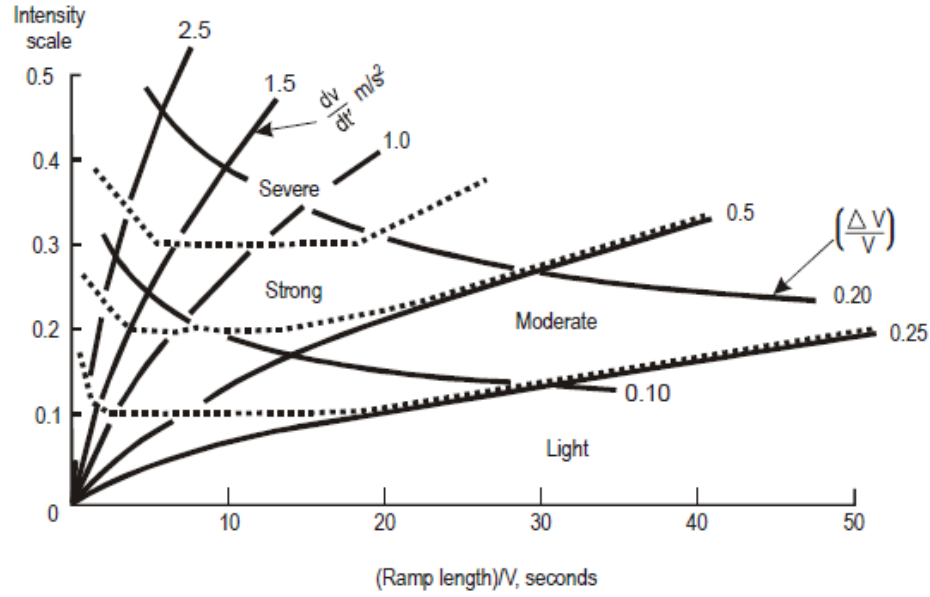

**Figure S3.** Boundaries for the classification of wind shear intensity as recommended by the ICAO Manual on Low-level Wind Shear [24] and originally proposed by Woodfield and Woods [23] (see main article for references).

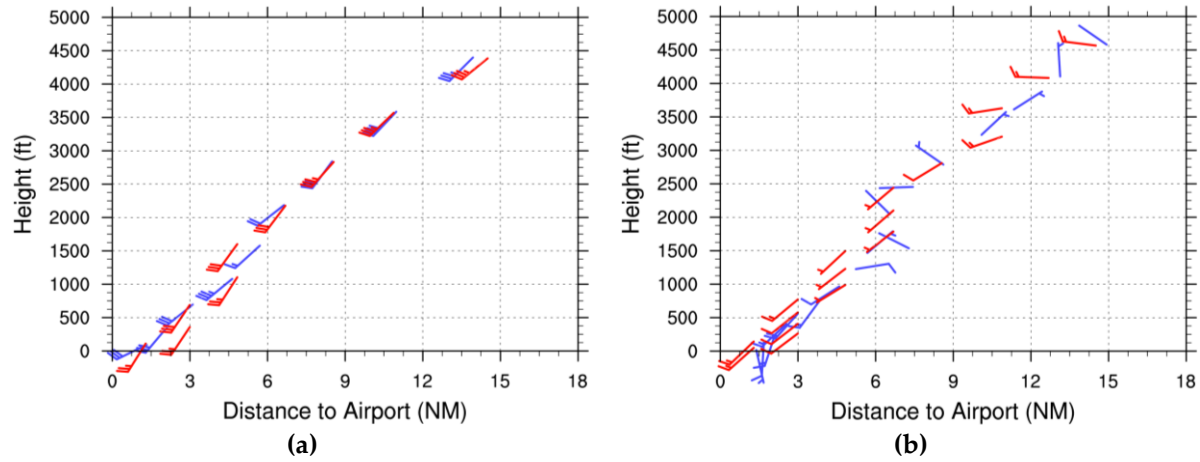

**Figure S4.** Wind profile along flight path (see Figure 2) according to aerial observations and AROME for: (a) Flight 1; (b) Flight 2. Wind barbs in blue depict aerial observations while those in red represent AROME forecasts.

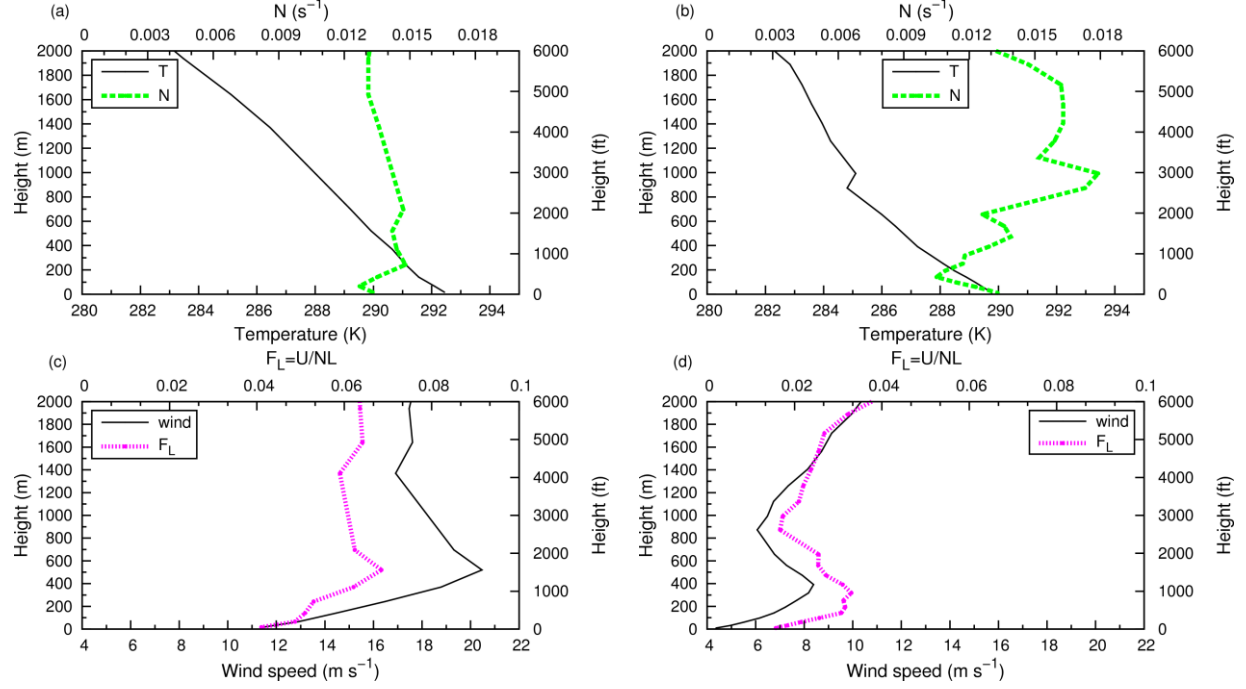

**Figure S5.** Absolute temperature and  $N$  profiles at point C for: (a) Flight 1; (b) Flight 2. Wind speed and  $F_L$  profiles at point C for: (c) Flight 1; (d) Flight 2.

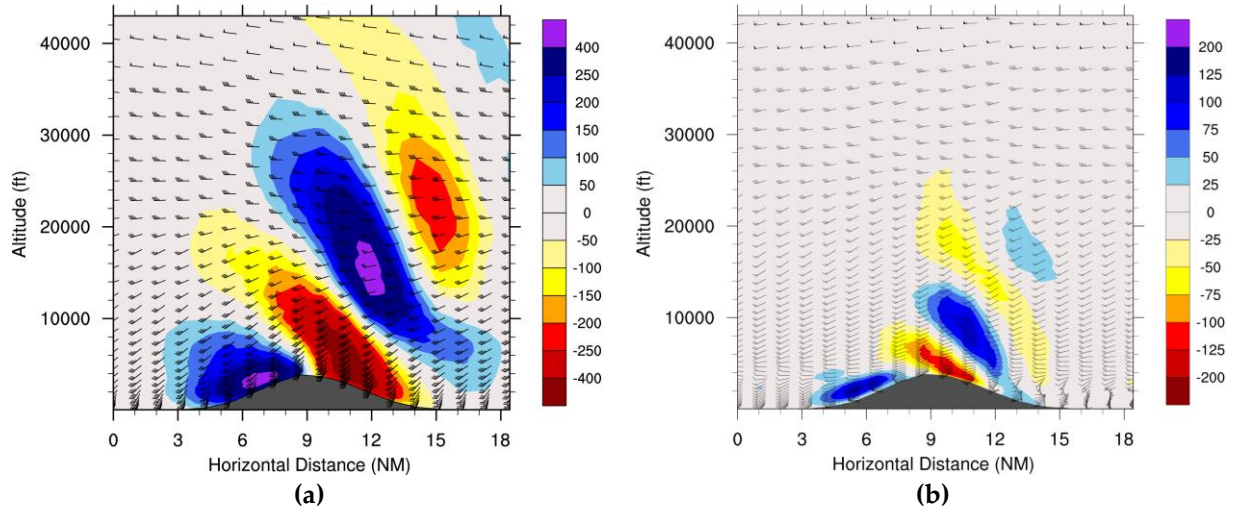

**Figure S6.** (a) Vertically propagating mountain waves predicted by AROME model during Flight 1; (b) and during Flight 2. Shading denotes up or downdraft intensity with a positive sign corresponding to an updraft.

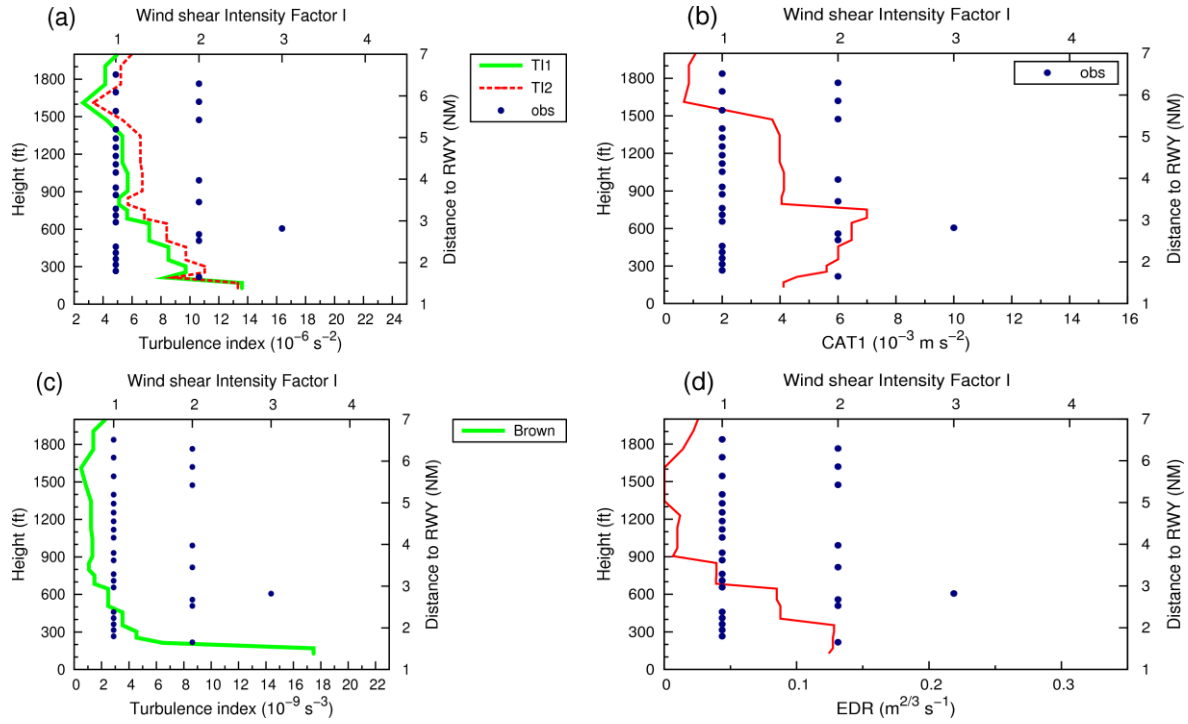

**Figure S7.** AROME turbulence indicators (bottom x-axis) versus the Wind shear Intensity Factor I (top x-axis), along the flight path during Flight 2. The green dots indicate the Wind Shear Intensity Factor “I”.

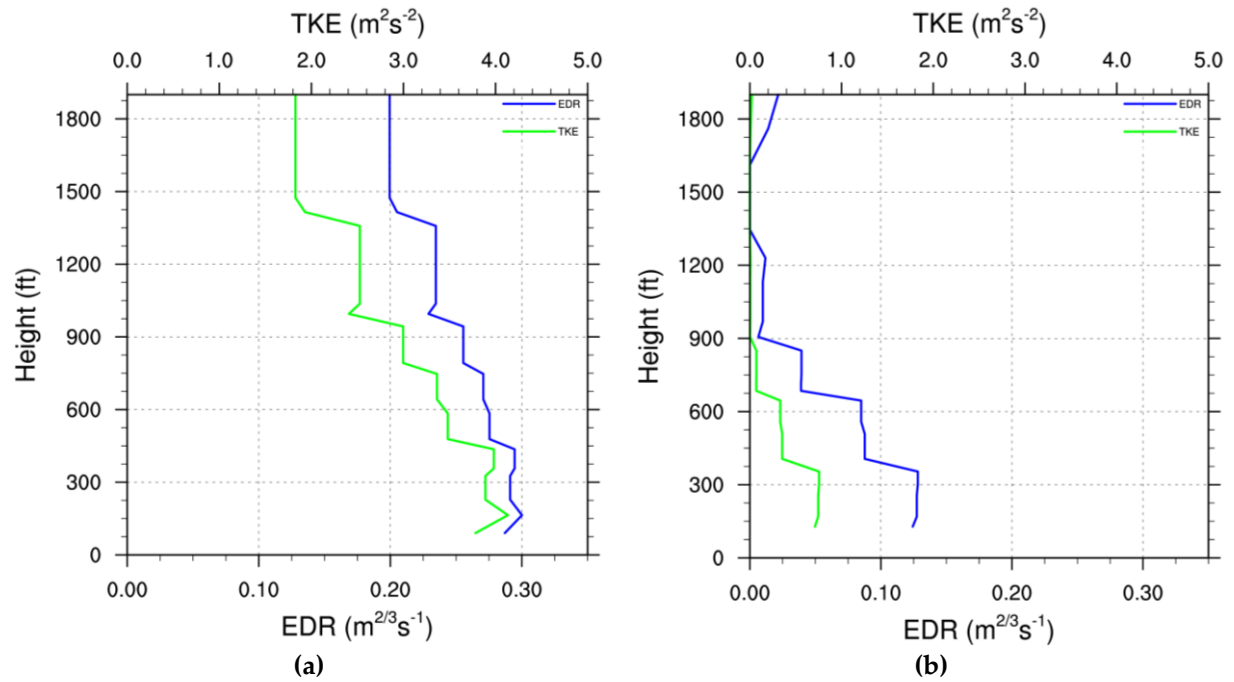

**Figure S8:** Variation of Turbulent Kinetic Energy (TKE) and Eddy Dissipation Rate (EDR) with height for (a): Flight 1 and (b) Flight 2.

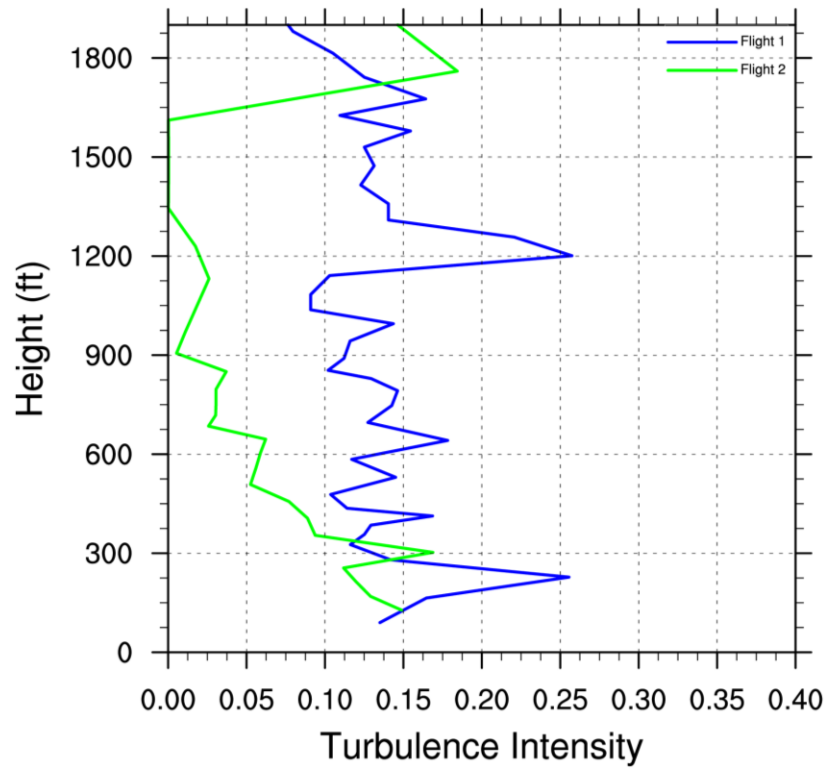

Figure S9: Turbulence Intensity for both Flights.

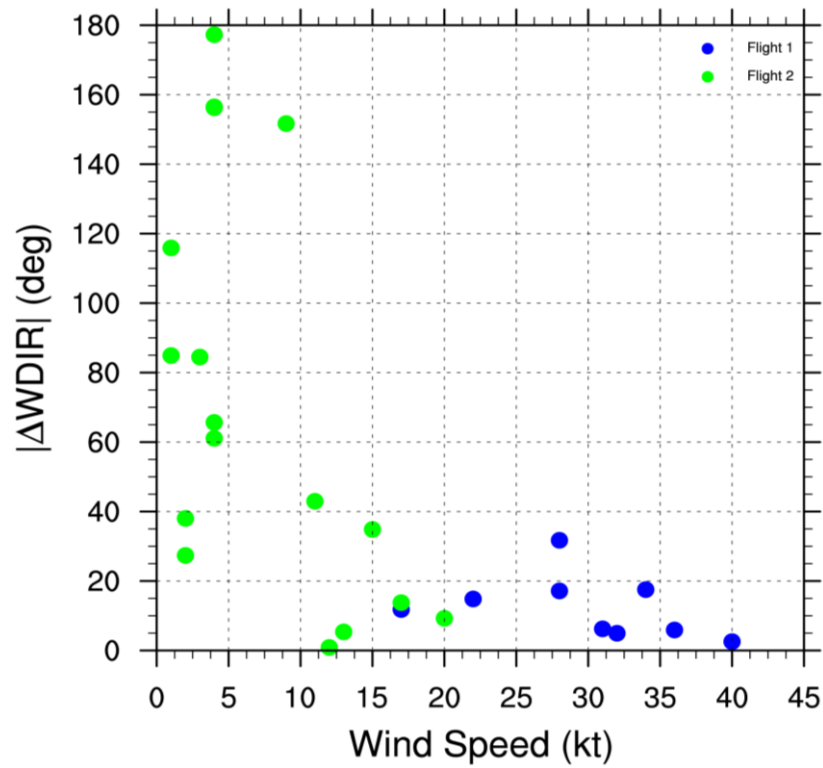

Figure S10: Absolute value wind direction errors versus wind speed for both Flights.
